# THE AMERICAN JOURNAL OF PSYCHIATRY

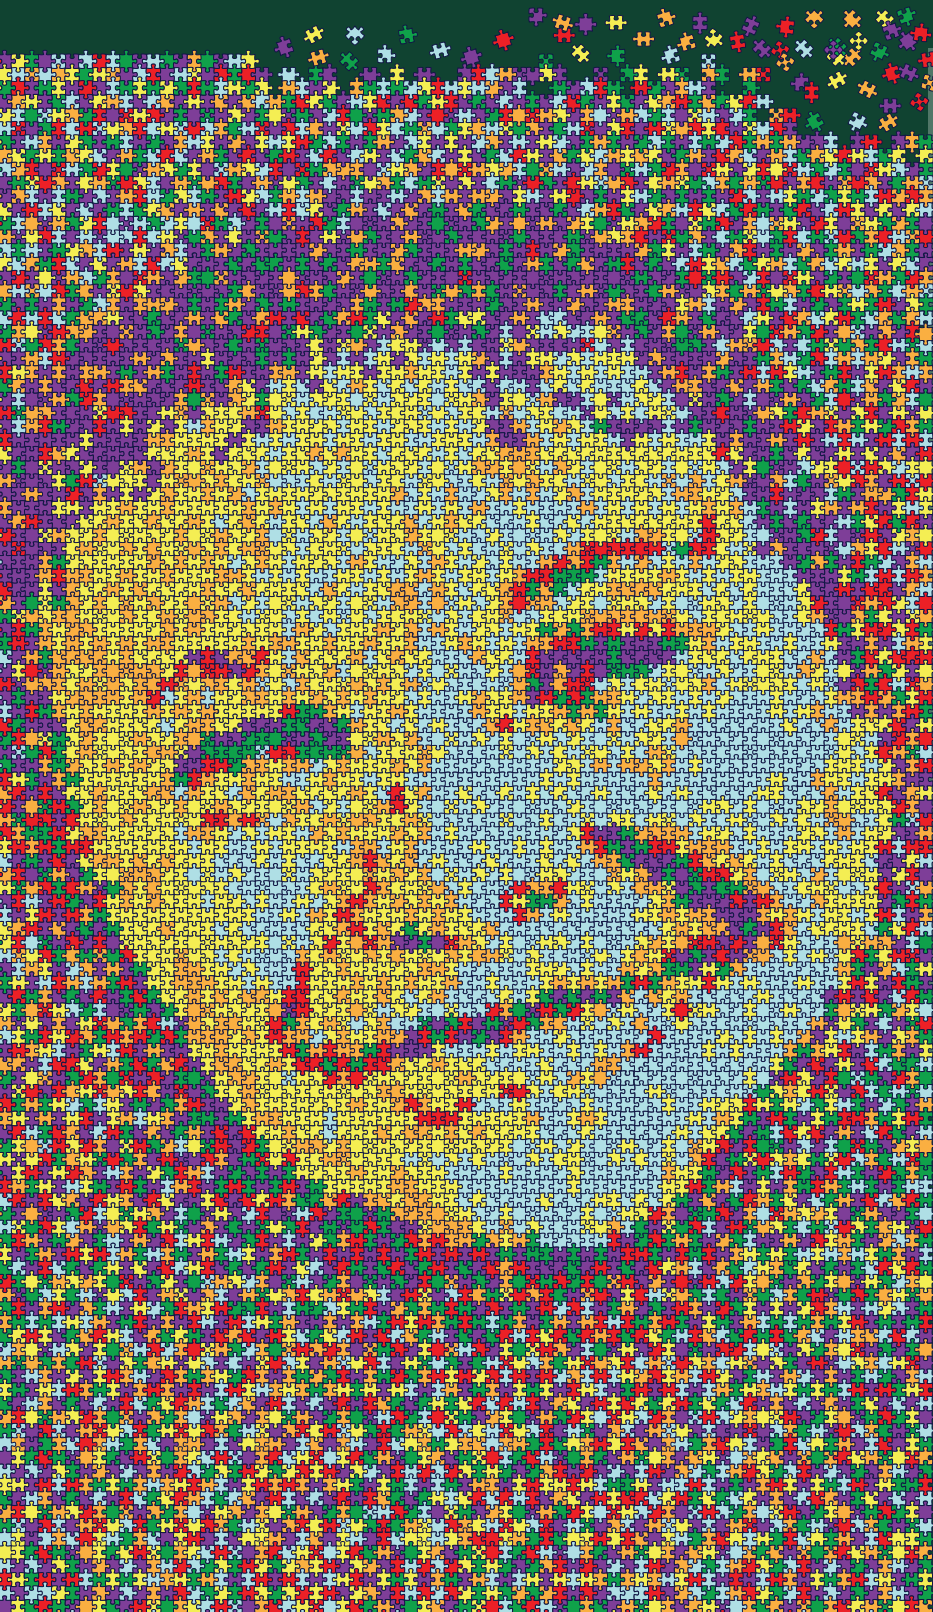

Short-Term Psychodynamic  
Psychotherapy and  
Cognitive-Behavioral Therapy in  
Generalized Anxiety Disorder: A  
Randomized, Controlled Trial  
Falk Leichsenring, D.Sc., et al. 875

Reducing Suicidal Ideation and  
Depression in Older Primary Care  
Patients: 24-Month Outcomes of  
the PROSPECT Study  
George S. Alexopoulos, M.D., et al. 882

◀ Relationship Between  
Cingulo-Insular Functional  
Connectivity and Autistic Traits in  
Neurotypical Adults  
Adriana Di Martino, M.D., et al. 891

◀ Neuroanatomic Alterations and  
Social and Communication  
Deficits in Monozygotic Twins  
Discordant for Autism Disorder  
Shanti R. Mitchell, M.S., et al. 917

Continuing Medical Education 951

August 2009  
Volume 166 • Number 8

Official Journal of the  
AMERICAN PSYCHIATRIC ASSOCIATION

[ajp.psychiatryonline.org](http://ajp.psychiatryonline.org)
