# THE AMERICAN JOURNAL OF PSYCHIATRY

## EDITOR-IN-CHIEF

Robert Freedman, M.D.

## DEPUTY EDITORS

David A. Lewis, M.D.

Robert Michels, M.D.

Daniel S. Pine, M.D.

Susan K. Schultz, M.D.

Carol A. Tamminga, M.D.

## EDITORIAL STAFF

### Editorial Director

Michael D. Roy

### Senior Editor/Features Writer

Jane Weaver, E.L.S.

### Senior Editor

John J. Guardiano, Ph.D.

### Production Manager

Julie C. Blair

### Graphic Designer

Steve Hennessey

### Assistant Editor

Angela Moore

### Editorial Support

### Services Manager

Kourtney Skinner

### Editorial Assistant

Samantha Luck

### Administrative Assistant

Victoria Chihos

### Assistants to the Editors

Lois Lilienthal

Lindsay Karr

Rachel Hogg

Russell A. Scholl

## ASSOCIATE EDITORS

Kathleen T. Brady, M.D., Ph.D.

David A. Brent, M.D.

Linda Brzustowicz, M.D.

Cameron S. Carter, M.D.

Howard H. Goldman,  
M.D., Ph.D.

Daniel C. Javitt, M.D.

Bankole Johnson, M.D.

Ellen Leibenluft, M.D.

Jeffrey A. Lieberman, M.D.

Barbara Milrod, M.D.

Maria A. Oquendo, M.D.

Jerrold F. Rosenbaum, M.D.

A. John Rush, M.D.

Larry J. Siever, M.D.

Patricia Suppes, M.D., Ph.D.

Myrna M. Weissman, Ph.D.

## EDITOR EMERITUS

Nancy C. Andreasen,  
M.D., Ph.D.

## FORMER EDITORS

John C. Nemiah, M.D.  
1978-1993

Amariah Brigham, M.D.  
1844-1849

T. Romeyn Beck, M.D.  
1849-1854

John P. Gray, M.D.  
1854-1886

G. Alder Blumer, M.D.  
1886-1894

Richard Dewey, M.D.  
1894-1897

Henry M. Hurd, M.D.  
1897-1904

Edward N. Brush, M.D.  
1904-1931

Clarence B. Farrar, M.D.  
1931-1965

Francis J. Braceland, M.D.  
1965-1978

The American Journal of Psychiatry is online at [ajp.psychiatryonline.org](http://ajp.psychiatryonline.org)

# The Residents' JOURNAL

Last Issue's

## Table of Contents

- 2 Residents in Psychotherapy: Where Have All the Hours Gone?  
Paul P. Christopher, M.D.
- 3 The Making of A Good Therapist: One Resident's Perspective  
Amy Yang, M.D.
- 4 Manifest Similarities: More Than Skin Deep  
C. Joy Somberg, M.D.
- 6 Committee of Residents and Fellows

The Residents' Journal is sent free-of-charge to all psychiatry residents. Anyone interested in being included on the distribution list should contact Angela Moore, the Residents' Journal staff editor at [ajp@psych.org](mailto:ajp@psych.org) with "Subscribe to Residents' Journal" in the subject line.

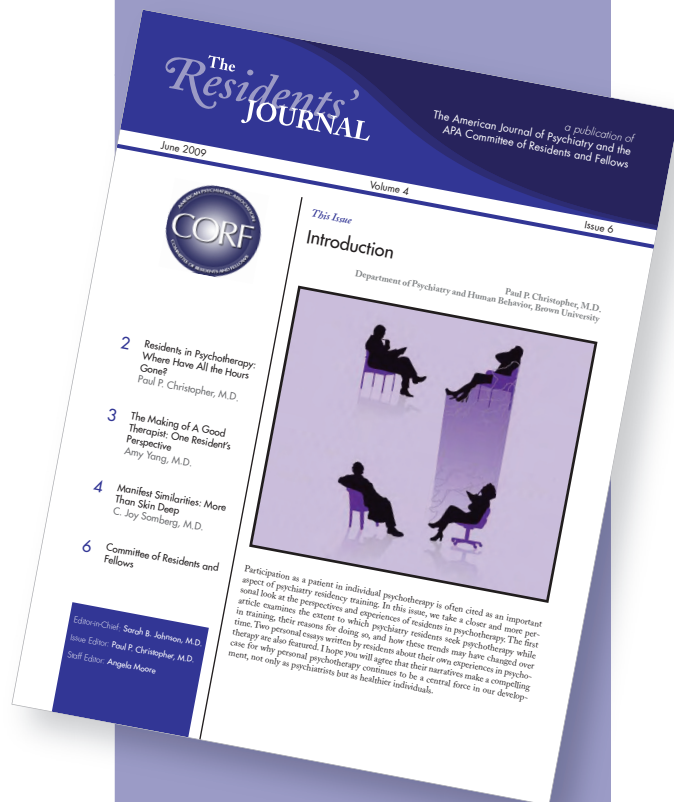

a publication of  
The American Journal of Psychiatry and the  
APA Committee of Residents and Fellows

# THE AMERICAN PSYCHIATRIC ASSOCIATION

1000 Wilson Blvd., Suite 1825, Arlington, VA 22209-3901  
(888) 357-7924 (toll-free inside the U.S. and Canada) / (703) 907-7300  
web site: [www.psych.org/](http://www.psych.org/) e-mail: [apa@psych.org](mailto:apa@psych.org)

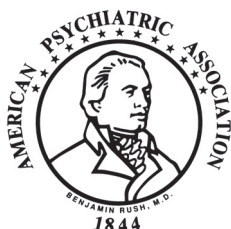

## OFFICERS 2009–2010

|                     |                                 |
|---------------------|---------------------------------|
| President           | Alan F. Schatzberg, M.D.        |
| President-Elect     | Carol A. Bernstein, M.D.        |
| Vice-President      | Jeffrey L. Geller, M.D., M.P.H. |
| Secretary-Treasurer | David Fassler, M.D.             |

## ASSEMBLY

|               |                           |
|---------------|---------------------------|
| Speaker       | Gary S. Weinstein, M.D.   |
| Speaker-Elect | Bruce A. Hershfield, M.D. |
| Recorder      | Ann Marie Sullivan, M.D.  |

## MEDICAL DIRECTOR'S OFFICE

|                                                                        |                                |
|------------------------------------------------------------------------|--------------------------------|
| Medical Director<br>and CEO                                            | James H. Scully, Jr., M.D.     |
| Chief Executive<br>Officer, American<br>Psychiatric<br>Publishing, Inc | Ronald E. McMillen             |
| Executive Director,<br>APIRE,<br>Division of Research                  | Darrel A. Reiger, M.D., M.P.H. |
| Executive Director,<br>American Psychiatric<br>Foundation              | Paul T. Burke                  |

## BOARD OF TRUSTEES

|                           |                                  |
|---------------------------|----------------------------------|
| Becky Bay, M.D.           | Carolyn B. Robinowitz, M.D.      |
| Thomas K. Ciesla, M.D.    | Pedro Ruiz, M.D.                 |
| Mary Helen Davis, M.D.    | Jacqueline N. Smith, M.D.        |
| Melinda G. Fierros, M.D.  | Joyce A. Spurgeon, M.D.          |
| Dilip V. Jeste, M.D.      | Frederick J. Stoddard, Jr., M.D. |
| James E. Nininger, M.D.   | Nada L. Stotland, M.D., M.P.H.   |
| Roger Peele, M.D.         | John Chapman Urbaitis, M.D.      |
| Kayla M. Pope, M.D., J.D. | John J. Wernert III, M.D.        |
|                           | William M. Womack, M.D.          |

## AMERICAN PSYCHIATRIC PUBLISHING, INC

### BOARD OF DIRECTORS

|                          |                                         |
|--------------------------|-----------------------------------------|
| President and Chair      | Laura Weiss Roberts, M.D.               |
| Secretary                | Donna M. Norris, M.D.                   |
| Treasurer                | Joan A. Lang, M.D.                      |
| John M. Oldham,<br>M.D.  | Pedro Ruiz, M.D.                        |
| Katharine Phillips, M.D. | Donna E. Stewart, M.D.,<br>F.R.C.P.(C.) |
|                          | Amy Ursano, M.D.                        |

### EX-OFFICIO MEMBERS

|                                                           |                               |
|-----------------------------------------------------------|-------------------------------|
| APA President                                             | Alan F. Schatzberg, M.D.      |
| APA President-Elect                                       | Carol A. Bernstein, M.D.      |
| APA Secretary-<br>Treasurer                               | David Fassler, M.D.           |
| APA Medical Director<br>and CEO                           | James H. Scully, Jr., M.D.    |
| Editor-in-Chief,<br>The American Journal<br>of Psychiatry | Robert Freedman, M.D.         |
| Editor-in-Chief, Books                                    | Robert E. Hales, M.D., M.B.A. |

The American Journal of Psychiatry is online at [ajp.psychiatryonline.org](http://ajp.psychiatryonline.org)

# get CME from AJP

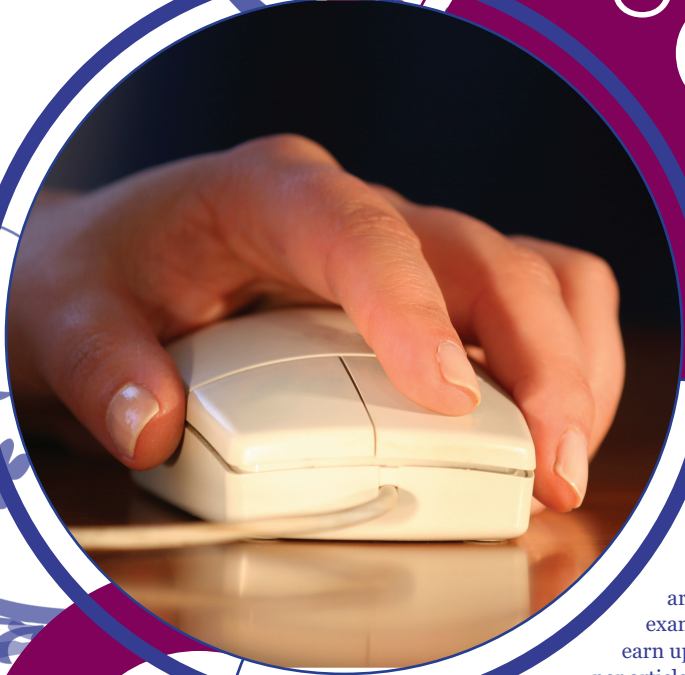

Brief companion exams are created for three of the most influential articles from each issue. By reading the articles and completing the online exams, you can test your knowledge and earn up to 1 AMA PRA Category 1 Credits™ per article. Correct answers are highlighted for your reference upon completion of the course; there is no minimum threshold score necessary for the credit. A link from the question to the correct answer in context will also be highlighted in the associated article, thus extending the learning experience.

CME credit is only provided online, and a subscription to the AJP CME program is required. From the moment you subscribe to the AJP CME program, you will be able to select from 72 courses from among 40 possible subject areas. You'll also be able to access the next 33 courses as they become available. For more information and pricing, please go to <http://cme.psychiatryonline.org/misc/aboutajpcme.shtml>

This activity is sponsored by the American Psychiatric Association. The American Psychiatric Association is accredited by the Accreditation Council for Continuing Medical Education to provide continuing medical education for physicians. The American Psychiatric Association designates this educational activity for a maximum of 1 AMA PRA Category 1 Credits™. Physicians should only claim credit commensurate with the extent of their participation in the activity.

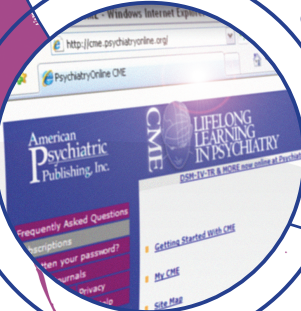

Fulfill your CME requirement while staying current on the latest advances in psychiatry.  
Subscribe to AJP CME!



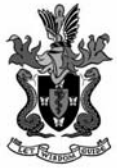

# THE BRITISH JOURNAL OF PSYCHIATRY

July 2009, VOL. 194

- A0 Editorial Board**  
**A2 Highlights of this issue**  
**Editorials**  
**1 Shooting the messenger: the science and politics of ethnicity research**  
S.P. Singh  
**3 The rise and fall of the biopsychosocial model**  
S.N. Ghaemi
- Reappraisal**  
**5 End of the road for treatment-as-usual studies?**  
T. Burns
- Review articles**  
**7 Prenatal risk factors for autism: comprehensive meta-analysis**  
H. Gardener, D. Spiegelman, and S.L. Buka  
**15 Effect of feedback of treatment outcome in specialist mental healthcare: meta-analysis**  
C. Knaup, M. Koesters, D. Schoefer, T. Becker, and B. Puschner  
**22 The Yellow Wallpaper (1892), Charlotte Perkins Gilman - psychiatrists in 19th-century fiction**  
F. Subotsky
- Papers**  
**23 Genetic utility of broadly defined bipolar schizoaffective disorder as a diagnostic concept**  
M.L. Hamshere, E.K. Green, I.R. Jones, L. Jones, V. Moskvina, G. Kirov, D. Grozeva, I. Nikolov, D. Vukcevic, S. Caesar, K. Gordon-Smith, C. Fraser, E. Russell, G. Breen, D. St Clair, D.A. Collier, A.H. Young, I.N. Ferrier, A. Farmer, P. McGuffin, Wellcome Trust Case Control Consortium, P.A. Holmans, M.J. Owen, M.C. O'Donovan, and N. Craddock  
**29 Bolts from the past - extra**  
P. Tyrer  
**30 Moderation of antidepressant response by the serotonin transporter gene**  
P. Huez-Diaz, R. Uher, R. Smith, M. Rietschel, N. Henigsberg, A. Marusic, O. Mors, W. Maier, J. Hauser, D. Souery, A. Placentino, A. Zobel, E.R. Larsen, P.M. Czerski, B. Gupta, F. Hoda, N. Perroud, A. Farmer, I. Craig, K.J. Aitchison, and P. McGuffin  
**39 Serotonin transporter genotype, morning cortisol and subsequent depression in adolescents**  
I.M. Goodyer, A. Bacon, M. Ban, T. Croudace, and J. Herbert  
**45 Are you anti-psychiatry? - extra**  
J. Main  
**46 DSM-IV personality disorders in the WHO World Mental Health Surveys**  
Y. Huang, R. Kotov, G. de Girolamo, A. Preti, M. Angermeyer, C. Benjet, K. Demyttenaere, R. de Graaf, O. Gureje, A.N. Karam, S. Lee, J.P. Lepine, H. Matschinger, J. Posada-Villa, S. Suliman, G. Vilagut, and R.C. Kessler  
**54 Rural-urban migration and depression in ageing family members left behind**  
M.A. Abas, S. Punpuing, T. Jirapramukpitak, P. Guest, K. Tangchonlatip, M. Leese, and M. Prince  
**61 Dementia in the acute hospital: prospective cohort study of prevalence and mortality**  
E.L. Sampson, M.R. Blanchard, L. Jones, A. Tookman, and M. King  
**67 Patterns of neurocognitive impairment in first-episode bipolar disorder and schizophrenia**  
S.L. Barrett, C.C. Mulholland, S.J. Cooper, and T. M. Rushe  
**73 Clinical effectiveness of online computerised cognitive-behavioural therapy without support for depression in primary care: randomised trial**  
L.E. de Graaf, S.A. H. Gerhards, A. Arntz, H. Riper, J.F. M. Metsemakers, S.M.A.A. Evers, J.L. Severens, G. Widdershoven, and M.J.H. Huibers  
**80 Stigma - in 100 words**  
P. Byrne
- Short report**  
**81 Randomised evaluation of assertive community treatment: 3-year outcomes**  
H. Killaspy, S. Kingett, P. Bebbington, R. Blizard, S. Johnson, F. Nolan, S. Pilling, and M. King
- Columns**  
**83 Correspondence**  
**87 Corrections**  
**88 Book reviews**  
**94 Contents of *Advances in Psychiatric Treatment***  
**95 Contents of the *American Journal of Psychiatry***  
**96 From the Editor's desk**

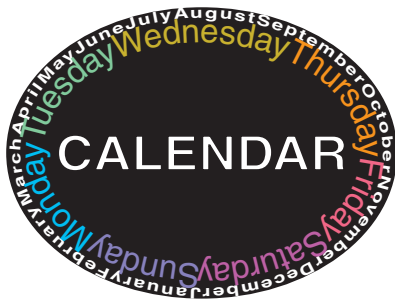

For free listing of your organization's official annual or regional meeting, please send us the following information: sponsor, location, inclusive dates, type and number of continuing education credits (if available), and the name, address, and telephone number of the person or group to contact for more information. In order for an event to appear in our listing, all notices and changes must be received at least 6 months in advance of the meeting and should be addressed to:

Calendar, American Journal of Psychiatry, 1000 Wilson Boulevard, Suite 1825, Arlington, VA 22209-3901, [jblair@psych.org](mailto:jblair@psych.org) (e-mail).

Because of space limitations, only listings of meetings of the greatest interest to Journal readers will be included.

## AUGUST

**August 27–30**, Canadian Psychiatric Association 59th Annual Meeting, St. Johns, Newfoundland, Canada. Contact: 260-441 MacLaren Street, Ottawa, ON K2P 2H3, Canada; (800) 267-1555 (tel), (613) 234-9857 (fax), [conferene@cpa-apc.org](mailto:conferene@cpa-apc.org) (e-mail). [www.cpa-apc.org](http://www.cpa-apc.org) (web site).

## OCTOBER

**October 8–11**, 61st Institute on Psychiatric Services, American Psychiatric Association, New York, NY. Contact: Jill Gruber, APA Annual Meetings Dept., 1000 Wilson Blvd., Ste. 1825, Arlington, VA 22209; (703) 907-7815.

**October 27–November 1**, 56th Annual Meeting of the American Academy of Child and Adolescent Psychiatry, Honolulu, HI. Contact: AACAP, 3615 Wisconsin Avenue, N.W., Washington, DC 20016-3007; (202) 966-7300 (tel), (202) 966-2891 (fax), [meetings@aacap.org](mailto:meetings@aacap.org) (e-mail), [www.aacap.org](http://www.aacap.org) (web site).

## NOVEMBER

**November 11–14**, 56th Annual Meeting, Academy of Psychosomatic

Medicine, Las Vegas, Nev. Contact: [www.apm.org](http://www.apm.org) (web site).

## MARCH 2010

**March 17–20**, 21st Annual Meeting, American Neuropsychiatric Association, Tampa, Fla. Contact: [www.anpaonline.org](http://www.anpaonline.org) (web site).

**March 17–20**, 4th Biennial Conference of the ISBD, San Paulo, Brazil. Contact: [isbd2010@icms.com.au](mailto:isbd2010@icms.com.au) (e-mail), [www.isbd2010.org](http://www.isbd2010.org) (web-site).

## MAY

**May 22–27**, 163rd Annual Meeting of the American Psychiatric Association, New Orleans, LA. Contact: Cathy Nash, APA Annual Meetings Dept., 1000 Wilson Blvd., Ste. 1825, Arlington, VA 22209; (703) 907-7822.

## OCTOBER

**October 14–17**, 62nd Institute on Psychiatric Services, American Psychiatric Association, Boston, MA. Contact: Jill Gruber, APA Annual Meetings Dept., 1000 Wilson Blvd., Ste. 1825, Arlington, VA 22209; (703) 907-7815.

**October 26–31**, 57th Annual Meeting of the American Academy of Child and Adolescent Psychiatry, New York, NY. Contact: AACAP, 3615 Wisconsin Avenue, N.W., Washington, DC 20016-3007; (202) 966-7300 (tel), (202) 966-2891 (fax), [meetings@aacap.org](mailto:meetings@aacap.org) (e-mail), [www.aacap.org](http://www.aacap.org) (web site).

## MAY 2011

**May 14–19**, 164th Annual Meeting of the American Psychiatric Association, Honolulu, HI. Contact: Cathy Nash, APA Annual Meetings Dept., 1000 Wilson Blvd., Ste. 1825, Arlington, VA 22209; (703) 907-7822.

## OCTOBER

**October 18–23**, 58th Annual Meeting of the American Academy of Child and Adolescent Psychiatry, Toronto, Ontario. Contact: AACAP, 3615 Wisconsin Avenue, N.W., Washington, DC 20016-3007; (202) 966-7300 (tel), (202) 966-2891 (fax), [meetings@aacap.org](mailto:meetings@aacap.org) (e-mail), [www.aacap.org](http://www.aacap.org) (web site).

**October 27–30**, 63rd Institute on Psychiatric Services, American Psychiatric Association, San Francisco, CA. Contact: Jill Gruber, APA Annual Meetings Dept., 1000 Wilson Blvd., Ste. 1825, Arlington, VA 22209; (703) 907-7815.

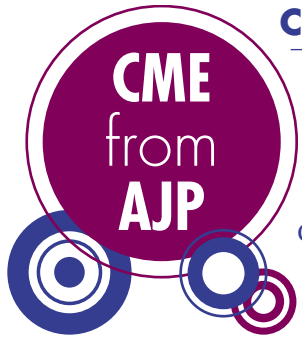

## Continuing Medical Education

Three articles in this issue form the basis of a short course with questions that can be answered for up to 1 hour of category 1 CME credit each by visiting <http://cme.psychiatryonline.org/> and clicking on “American Journal of Psychiatry CME.”

CME credit is issued only online, and a paid subscription to the AJP CME course program is required.

This month's courses appear on pages 951–954.

FREE AUDIO!

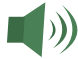

### Have You Heard?

You can listen to highlights of *The American Journal of Psychiatry* by downloading a monthly free .mp3 audio file from our web site (<http://ajp.psychiatryonline.org/misc/audio.dtl>) or by subscribing to the AJP Audio podcast at iTunes or other feed reader (e.g., NewzCrawler, FeedDemon, Bloglines, Google Reader). Presented by Deputy Editor Dr. Susan Schultz or by Editorial Director Michael Roy, each month's audio lasts approximately 30 minutes and covers several research articles, the Treatment in Psychiatry feature, and one or two editorials.

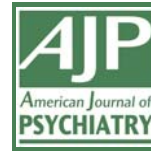

Coming in the September 2009 issue\*

## THE AMERICAN JOURNAL OF PSYCHIATRY

### *Sudden Death and Use of Stimulant Medications in Youths*

M.S. Gould, B.T. Walsh, J.L. Munfakh, M. Kleinman, N. Duan, M. Olfson, L. Greenhill, and T. Cooper

### *Long-Term Benefits of Short-Term Quality Improvement Interventions for Depressed Youths in Primary Care*

J.R. Asarnow, L.H. Jaycox, L. Tang, N. Duan, A.P. LaBorde, L.R. Zeledon, M. Anderson, P.J. Murray, C. Landon, M.M. Rea, and K.B. Wells

### *A Molecular Signature of Depression in the Amygdala*

Etienne Sibille, Y. Wang, J. Joeyen-Waldorf, C. Gaiteri, A. Surget, S. Oh, C. Belzung, G.C. Tseng, and D.A. Lewis

### *Evidence for an Interaction Between Familial Liability and Prenatal Exposure to Infection in the Causation of Schizophrenia*

M.C. Clarke, A. Tanskanen, M. Huttunen, J.C. Whittaker, and M. Cannon

\*Can't wait? Visit [ajp.psychiatryonline.org](http://ajp.psychiatryonline.org) and click the “AJP in Advance” logo to see all articles uploaded in advance of print!
